# Supplementary material for: A key role for sex chromosomes in the regulation of parthenogenesis in the brown alga Ectocarpus
Source: PLoS Genet. 2019 Jun 13;15(6):e1008211. doi: 10.1371/journal.pgen.1008211 (PMC6592573; doi:10.1371/journal.pgen.1008211)
Supplement: S6 Table — (XLSX) [file pgen.1008211.s007.xlsx]

## Sheet: Sheet1
Table S6. Statistics for the genetic map.
	LG	Number of markers	Length (cM)	Average spacing between markers (cM)	Maximum spacing between markers (cM)
	1	397	174	0.4	10.2
	2	363	104.3	0.3	8.6
	3	316	167.7	0.5	14.1
	4	289	117.2	0.4	7.7
	5	295	123	0.4	12.3
	6	291	129.4	0.4	9
	7	262	130	0.5	17.2
	8	230	130	0.6	14.1
	9	237	118	0.5	9.8
	10	217	109.1	0.5	6.9
	11	196	123.9	0.6	14.9
	12	184	135.1	0.7	9
	13	173	92.4	0.5	13.2
	14	176	81.7	0.5	10.6
	15	180	106.4	0.6	14.5
	16	169	83.4	0.5	11.5
	17	177	99.7	0.6	12.3
	18	176	95.6	0.5	12.3
	19	157	90.6	0.6	8.1
	20	157	74.6	0.5	11.5
	21	145	117.4	0.8	9.4
	22	124	65.4	0.5	4.9
	23	119	106.4	0.9	13.6
	24	117	104.2	0.9	17.6
	25	105	51.1	0.5	11.9
	26	81	81.1	1	11.1
	27	69	44.6	0.7	10.6
	28	70	48.6	0.7	7.7
	29	59	21	0.4	4
	30	33	8.9	0.3	2.4
	31	31	13	0.4	7.7
	Total	5595	2947.5	0.5	17.6
